# Supplementary material for: Supramolecular Structure, Hirshfeld Surface Analysis, Morphological Study and DFT Calculations of the Triphenyltetrazolium Cobalt Thiocyanate Complex
Source: MDPI journal article supplement (doi:10.3390/cryst13111598), 2023-11-19
Supplement: s1 [file s1]

# **Supplementary Materials of Supramolecular Structure, Hirshfeld Surface Analysis, Morphological Study and DFT Calculations of Triphenyltetrazolium Cobalt Thiocyanate Complex**

by

**Essam A. Ali, Rim Bechaieb, Rashad Al- Salahi, Ahmed S.M.Al-Janabi, Mohamed W. Attwa and  
Gamal A. E. Mostafa**

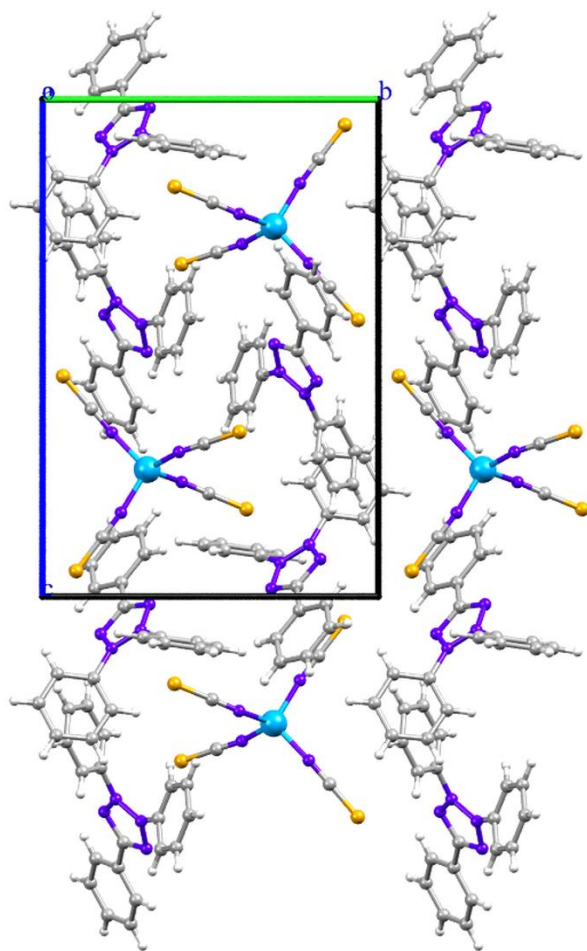

**Figure S1.** The crystal packing of (1) along *a* axis.

**Table S1:** Calculated UV-Vis spectrum, oscillator strength and the major contribution calculated using B3LYP functional.

| $\lambda_{\text{cal}}$ (nm) | Excitation energy (eV) | Oscillator strength | Major contributions                                                                                                               |
|-----------------------------|------------------------|---------------------|-----------------------------------------------------------------------------------------------------------------------------------|
| 501.82                      | 2.4707                 | 0.0184              | H-2Alpha -->L +12Alpha (0.70465)                                                                                                  |
| 431.81                      | 2.8713                 | 0.0120              | H-3beta -->L +14beta (0.26804)<br>H-1 beta-->L+14beta (0.31129)<br>H beta -->L+14 beta (0.33366)<br>H beta -->L+15 beta (0.39659) |
